# Supplementary material for: Damaging Effects of Multi-walled Carbon Nanotubes on Pregnant Mice with Different Pregnancy Times
Source: PubMed Central journal article supplement (PMC3950636; doi:10.1038/srep04352), 2014-03-12
Supplement: srep04352-s1.pdf [file srep04352-s1.pdf]

**Supplementary Information**

**Damaging Effects of Multi-walled Carbon Nanotubes on  
Pregnant Mice with Different Pregnancy Times**

Wei Qi<sup>1</sup>, Juanjuan Bi<sup>1</sup>, Xiaoyong Zhang<sup>2</sup>, Jing Wang<sup>1</sup>, Jianjun Wang<sup>1</sup>, Peng Liu<sup>1</sup>,  
Zhan Li<sup>3\*</sup>, Wangsuo Wu<sup>1,4\*</sup>

<sup>1</sup> Radiochemical Laboratory, Lanzhou University, Lanzhou, Gansu, China, 730000

<sup>2</sup> Department of Chemistry and Key Laboratory of Bioorganic Phosphorus Chemistry and Chemical Biology (Ministry of Education), Tsinghua University, Beijing, China, 100084

<sup>3</sup> Key Laboratory of Chemistry of Northwestern Plant Resources, Key Laboratory for Natural Medicine of Gansu Province, Institute of Chemical Physics, Chinese Academy of Sciences, Lanzhou, Gansu, China, 730000

<sup>4</sup> State Key Laboratory of Applied Organic Chemistry, Lanzhou University, Lanzhou, Gansu, China, 730000

\*Corresponding authors: Zhan Li, Email: [lizhancg@gmail.com](mailto:lizhancg@gmail.com) ; Wangsuo Wu, Email: [wuws@lzu.edu.cn](mailto:wuws@lzu.edu.cn).

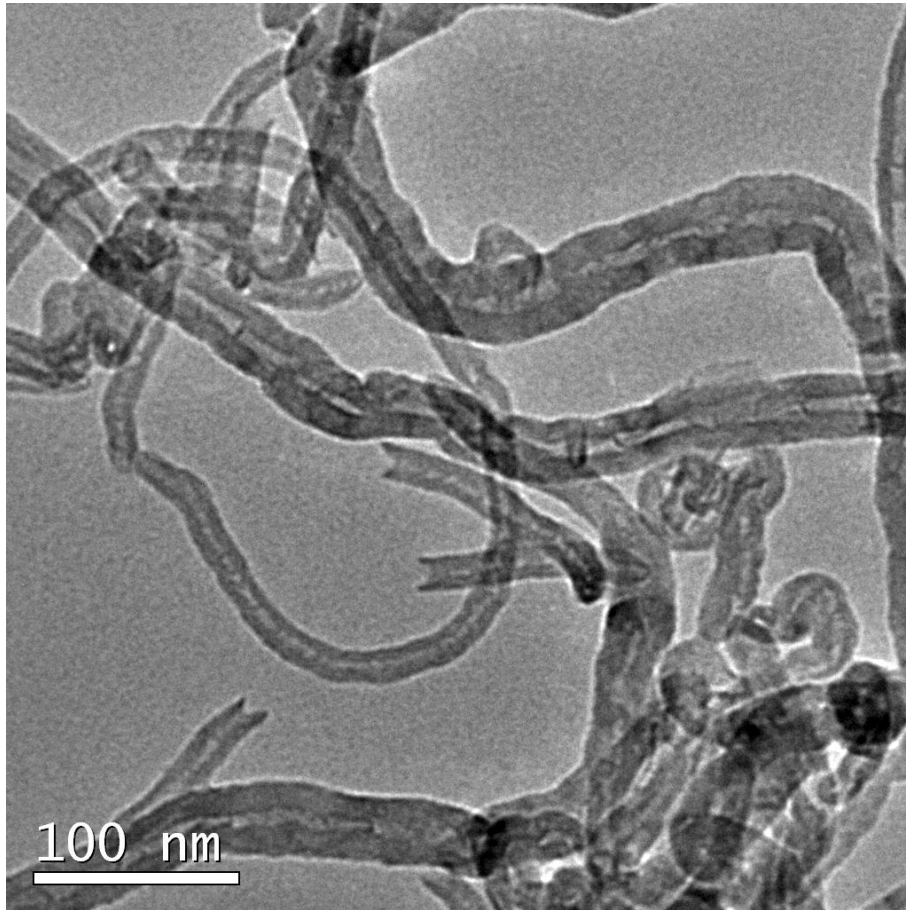

**Fig.S1 the TEM of oMWCNTs.**

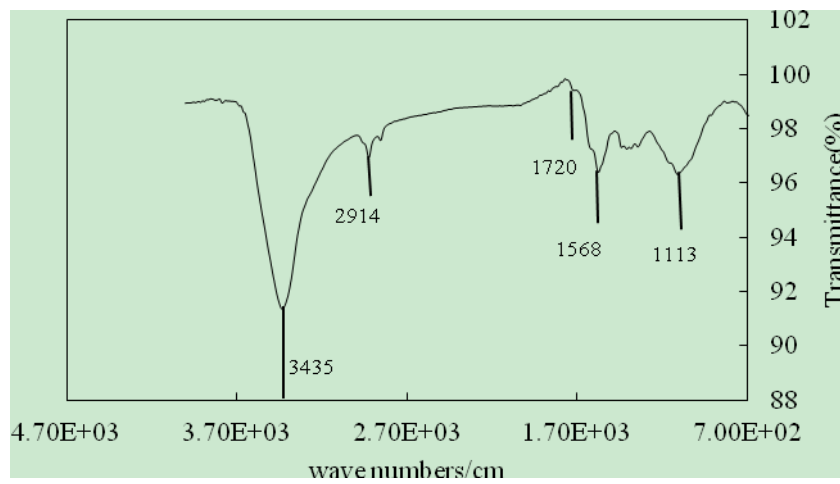

**Fig.S2 the FT-IRs of oMWCNTs.** The absorption peak of 3400/cm was OH<sup>-</sup>, and 1720-1730/cm was COOH<sup>-</sup>.

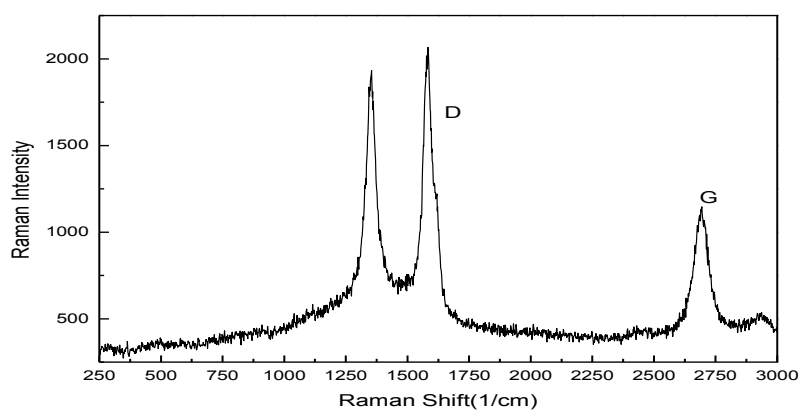

**Fig.S3 the Raman spectroscopy of oMWCNTs.** the D and G band of MWCNT still existed after oxidation, indicating that carbon nanotube structure was not changed.

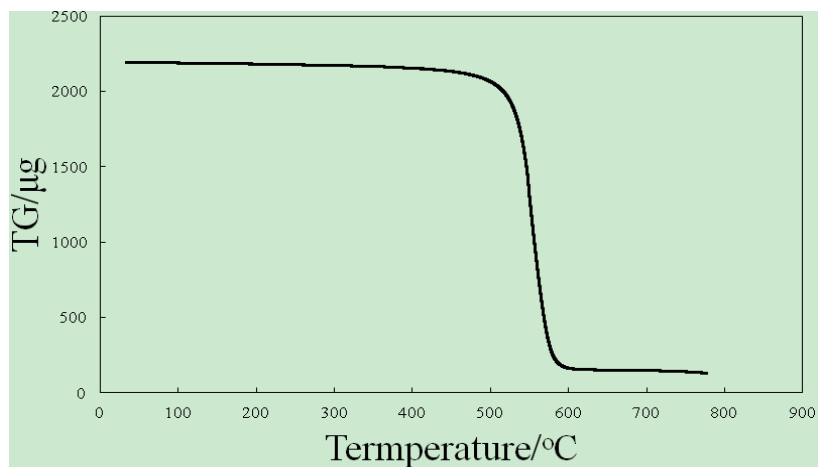

**Fig.S4 the TGA of oMWCNTs in air.**

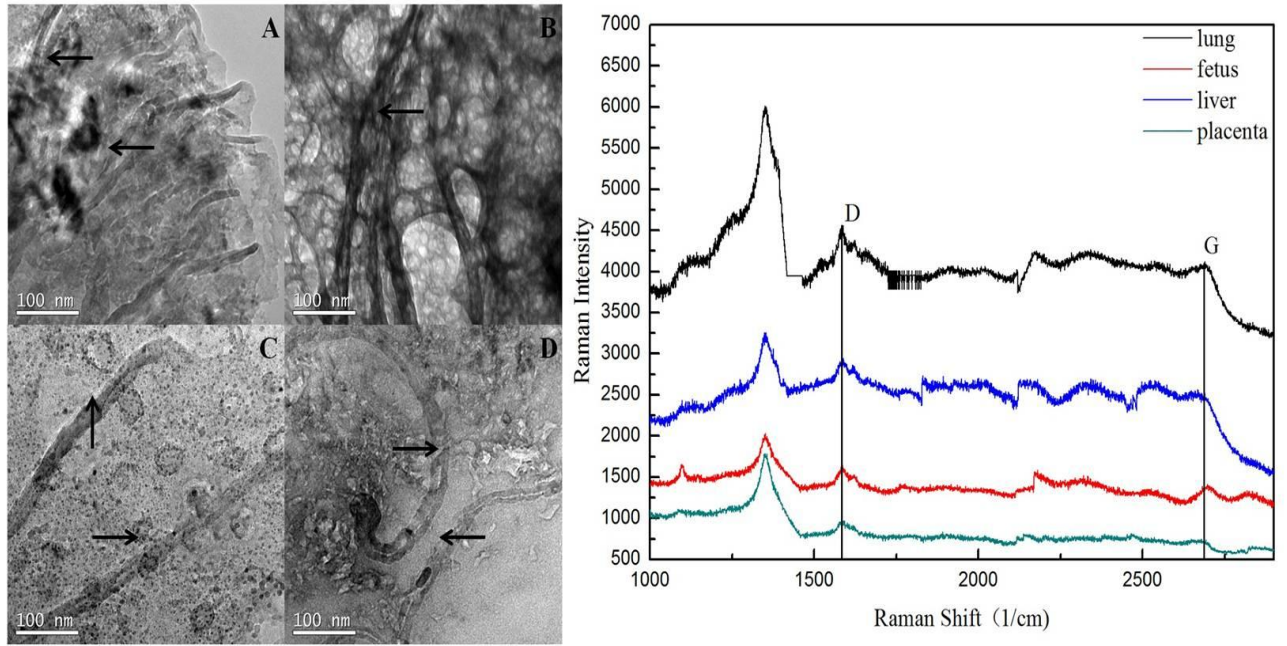

**Fig.S5** the observed results of oMWCNTs in TEM and Raman spectrum of tissues digestive solution. **A**, lung; **B**, liver; **C**, foetus; **D**, placenta.

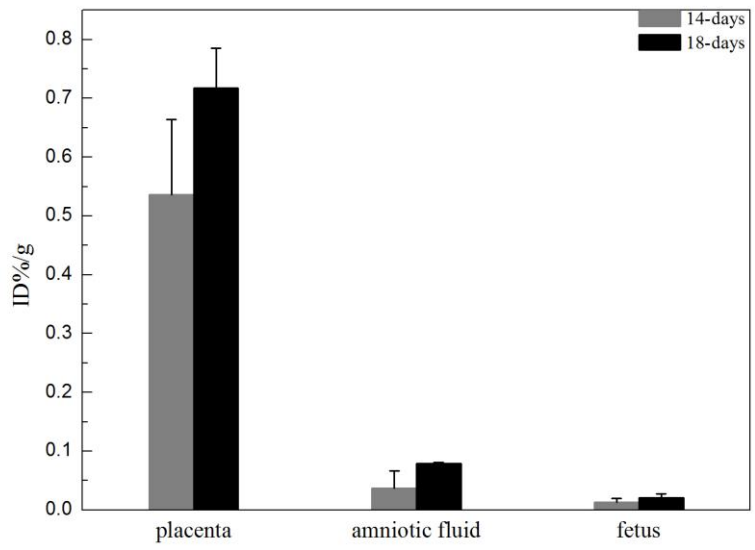

**Fig.S6** the distribution content of placenta, amniotic fluid, and foetus in 12h after exposure <sup>99m</sup>Tc-oMWCNTs (20mg/kg.bw) to pregnant mice at the gestational age of 14days and 18days.( n=5, all data represent means +sd.)

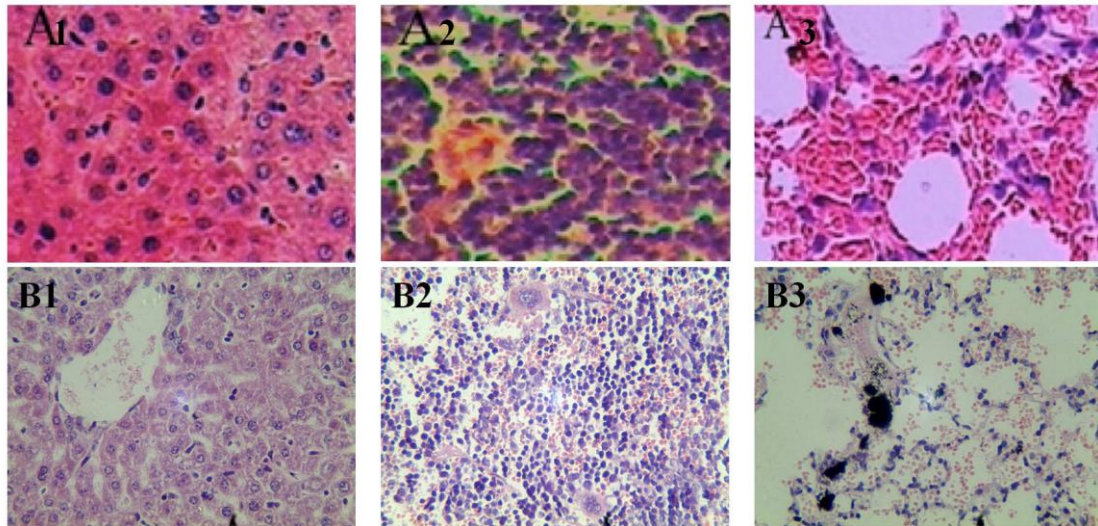

**Fig.S7** the histology of liver, spleen and lung of maternal body. **A1-A3**( $\times 40$ ) is for liver, spleen and lung of control groups, **B1-B3**( $\times 10$ ) is for liver, spleen and lung of exposure groups respectively; the figures showed that oMWCNTs was captured obviously by lung, and edema or hyperemia occurred in liver, spleen and lung of exposure groups.

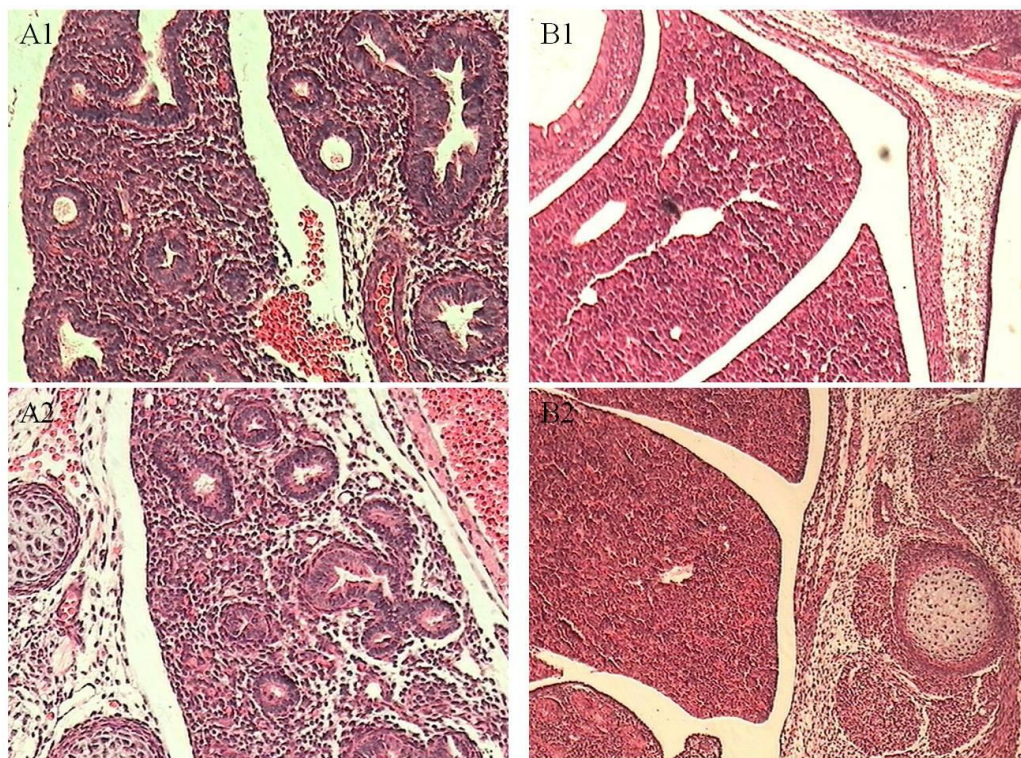

**Fig.S8** the histology of lung ( $\times 10$ ) and liver of foetus ( $\times 4$ ) for first-pregnant mice. **A1, B1** is for lung and liver of normal groups, respectively; **A2, B2** is for lung and liver of exposure groups, respectively.

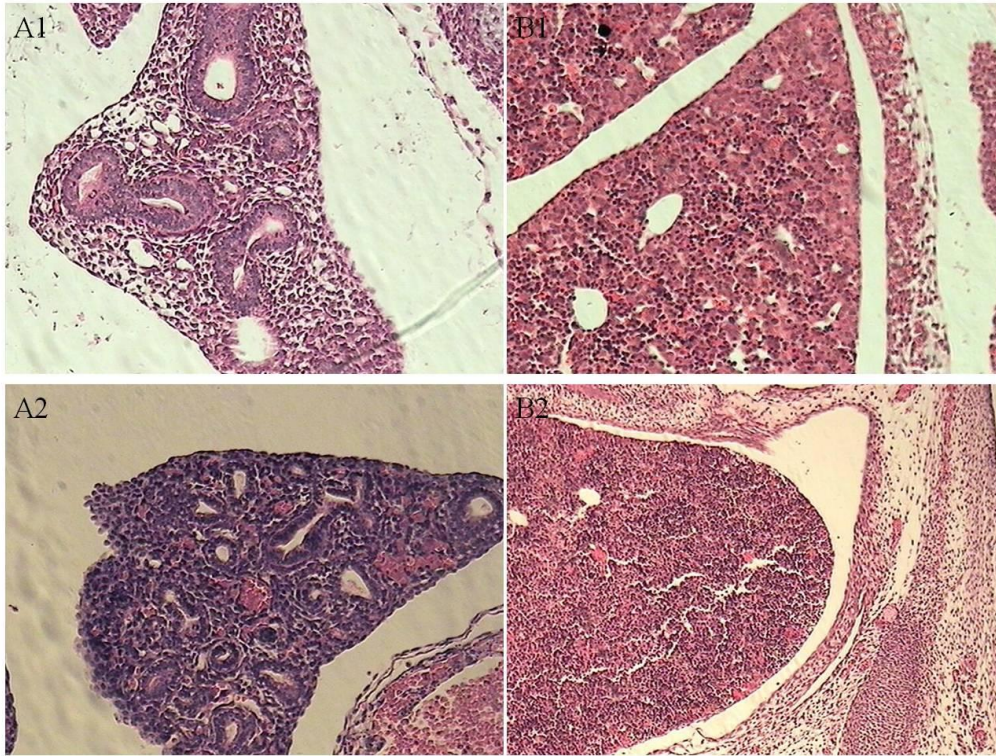

**Fig.S9** the histology of lung ( $\times 10$ ) and liver of foetus ( $\times 10$ ) for second-pregnant mice. **A1, B1** is for lung and liver of normal groups, respectively; **A2, B2** is for lung and liver of exposure groups, respectively.

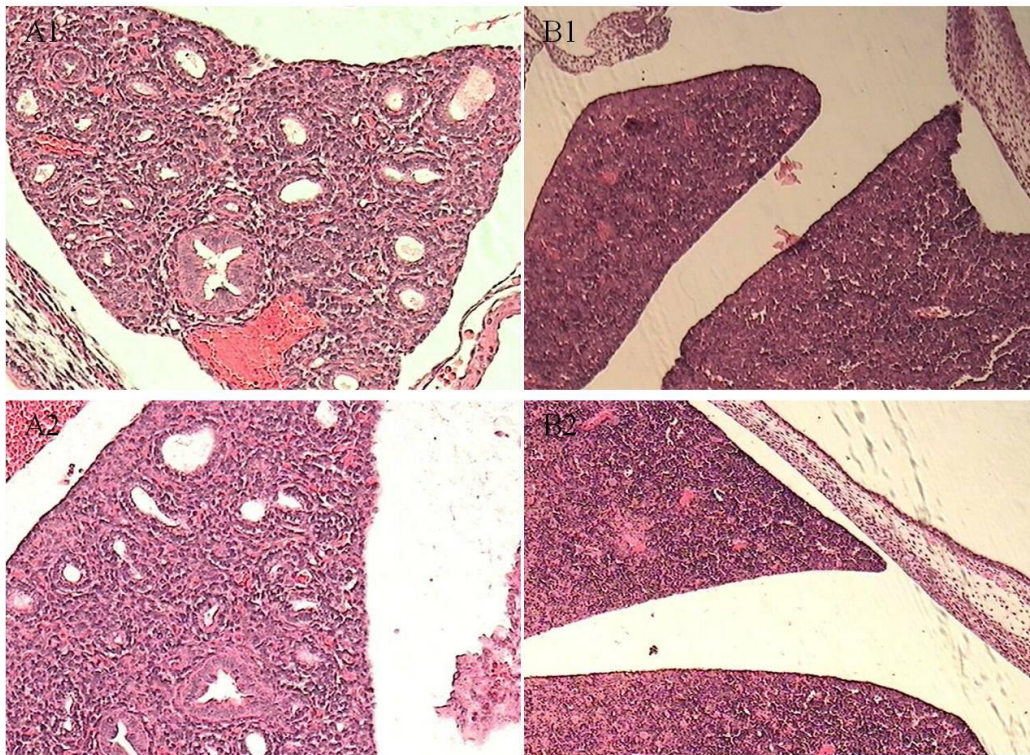

**Fig.S10** the histology of lung ( $\times 10$ ) and liver of foetus ( $\times 4$ ) for fourth-pregnant mice. **A1, B1** is for lung and liver of normal groups, respectively; **A2, B2** is for lung and liver of exposure groups, respectively.
